# Supplementary material
Source: PubMed Central journal article supplement (PMC5916328)
Supplement: NIHMS921717-supplement.pdf [file NIHMS921717-supplement.pdf]

## 1 **SUPPLEMENTARY METHODS**

### 2 **Primary Myoblast Culture**

3 Primary myoblasts were harvested from Pax7<sup>iCreERT2</sup>/ROSA26<sup>LSL-tdTomato</sup> mice by  
4 dissecting out the hind limb muscles. Tissue was minced to a fine paste and then  
5 mixed with 2% w/v collagenase II (Gibco 17101-015) in F12 media and digested  
6 with rotation for 1 hour at 37<sup>o</sup> C. Digested sample was triturated with an 18G  
7 needle, returned to rotate/incubate for 15 minutes, and triturated again. The  
8 collagenase reaction was quenched with F12+15% horse serum, 1%  
9 penicillin/streptomycin and then filtered through 100, 70 and 40 µm cell strainers  
10 (Fisher 22363547). Resultant suspension was run through satellite cell negative  
11 isolation columns (Miltenyi Biotech 130-042-401) and flow through was plated on  
12 0.1% gelatin-coated coverslips. Satellite cells were grown in DMEM/F12 20%  
13 fetal bovine serum, 10% horse serum, 1% penicillin/streptomycin, 1% chick  
14 embryo extract, 0.1% amphotericin B and FGF (1:5000) for 4 days until cells  
15 were adhered. On the 4<sup>th</sup> day, cultures were switched to LC-CM and allowed to  
16 grow for 48 hours until clone sizes on the coverslip were at 64-128 cell stage.  
17 Cells were treated with EdU for 2 hours prior to fixing. Coverslips were fixed and  
18 stained for Myogenin and EdU as described previously.

### 19 **Reverse phase protein array (RPPA) analysis**

20 C2C12 cells were treated with CXCL1 (as in figure 2) and protein lysates were  
21 prepared 6h post-treatment according to instructions from the MD Anderson  
22 Functional Proteomics Core Facility  
23 ([https://www.mdanderson.org/research/research-resources/core-](https://www.mdanderson.org/research/research-resources/core-facilities/functional-proteomics-rppa-core/getting-started.html)  
24 [facilities/functional-proteomics-rppa-core/getting-started.html](https://www.mdanderson.org/research/research-resources/core-facilities/functional-proteomics-rppa-core/getting-started.html)). Protein lysates  
25 were quantified by BCA prior to analysis. Bioinformatics analyses were  
26 performed using Gene Cluster 3.0  
27 (<http://bonsai.hgc.jp/~mdehoon/software/cluster/>) and visualized using Java  
28 TreeView (<http://jtreeview.sourceforge.net/>). Interaction networks and pathway  
29 analyses were performed in STRING (<https://string-db.org/>).

# Supplementary Figure S1

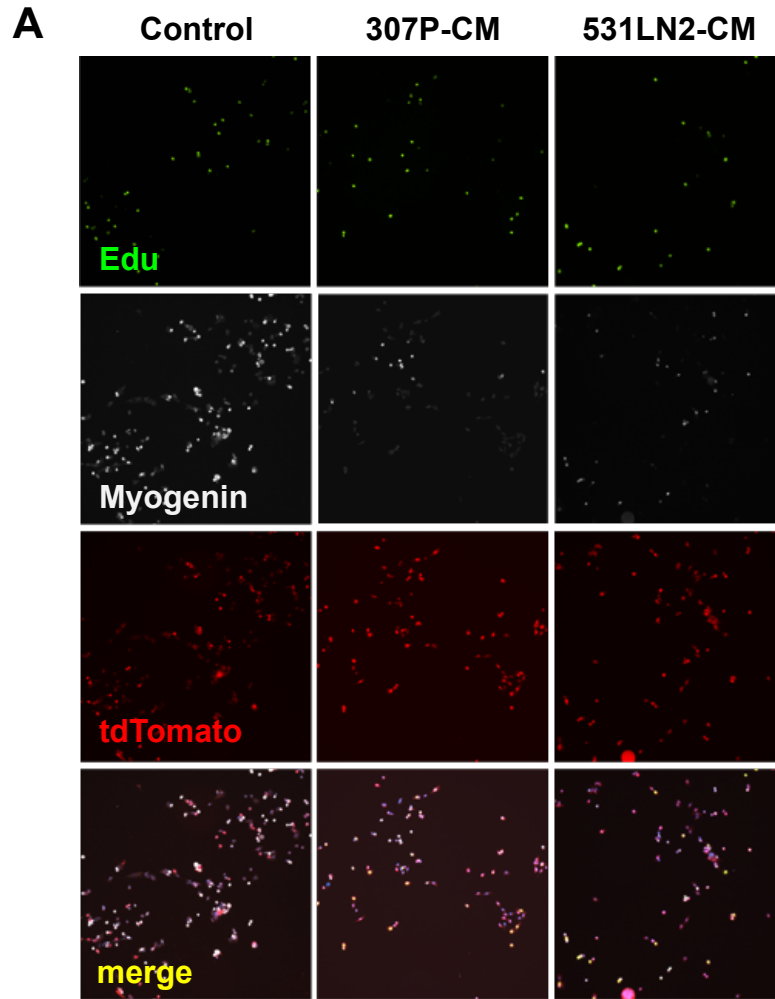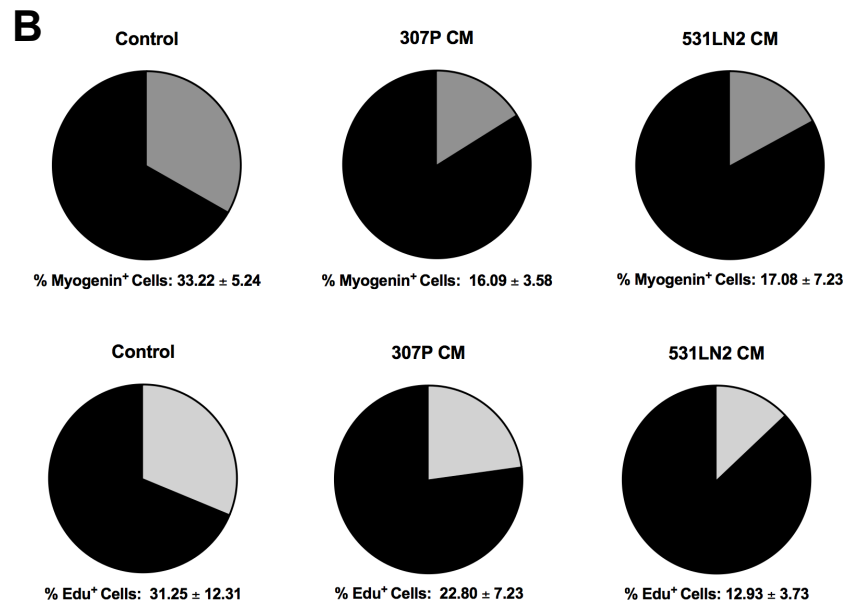

**Supplementary Figure S1. Tumor-derived factors impair myogenic progression of primary myoblast cell cultures. (A)** Representative images of primary myoblasts from Pax7<sup>iCreERT2</sup>/ROSA26<sup>LSL-tdTomato</sup> mice treated with control (primary myoblast growth media), 531LN2 LC-CM, or 307P LC-CM media and stained/imaged to detect total Pax7<sup>+</sup> cell number, Edu<sup>+</sup> cell abundance, and Myogenin expression. **(B)** Pie graphs depicting the fraction of Myogenin<sup>+/-</sup> (top) or Edu<sup>+/-</sup> (bottom) cells within the Pax7<sup>+</sup>/tdTomato<sup>+</sup> population. Myogenin levels were significantly lower in both LC-CM treatments as compared to control ( $p < 0.05$  using a two-tailed paired t test). 5-7 representative fields quantified for each biological replicate (control, 307P: N=5; 531LN2: N=3) and at least 100 cells were quantified for each biological replicate.

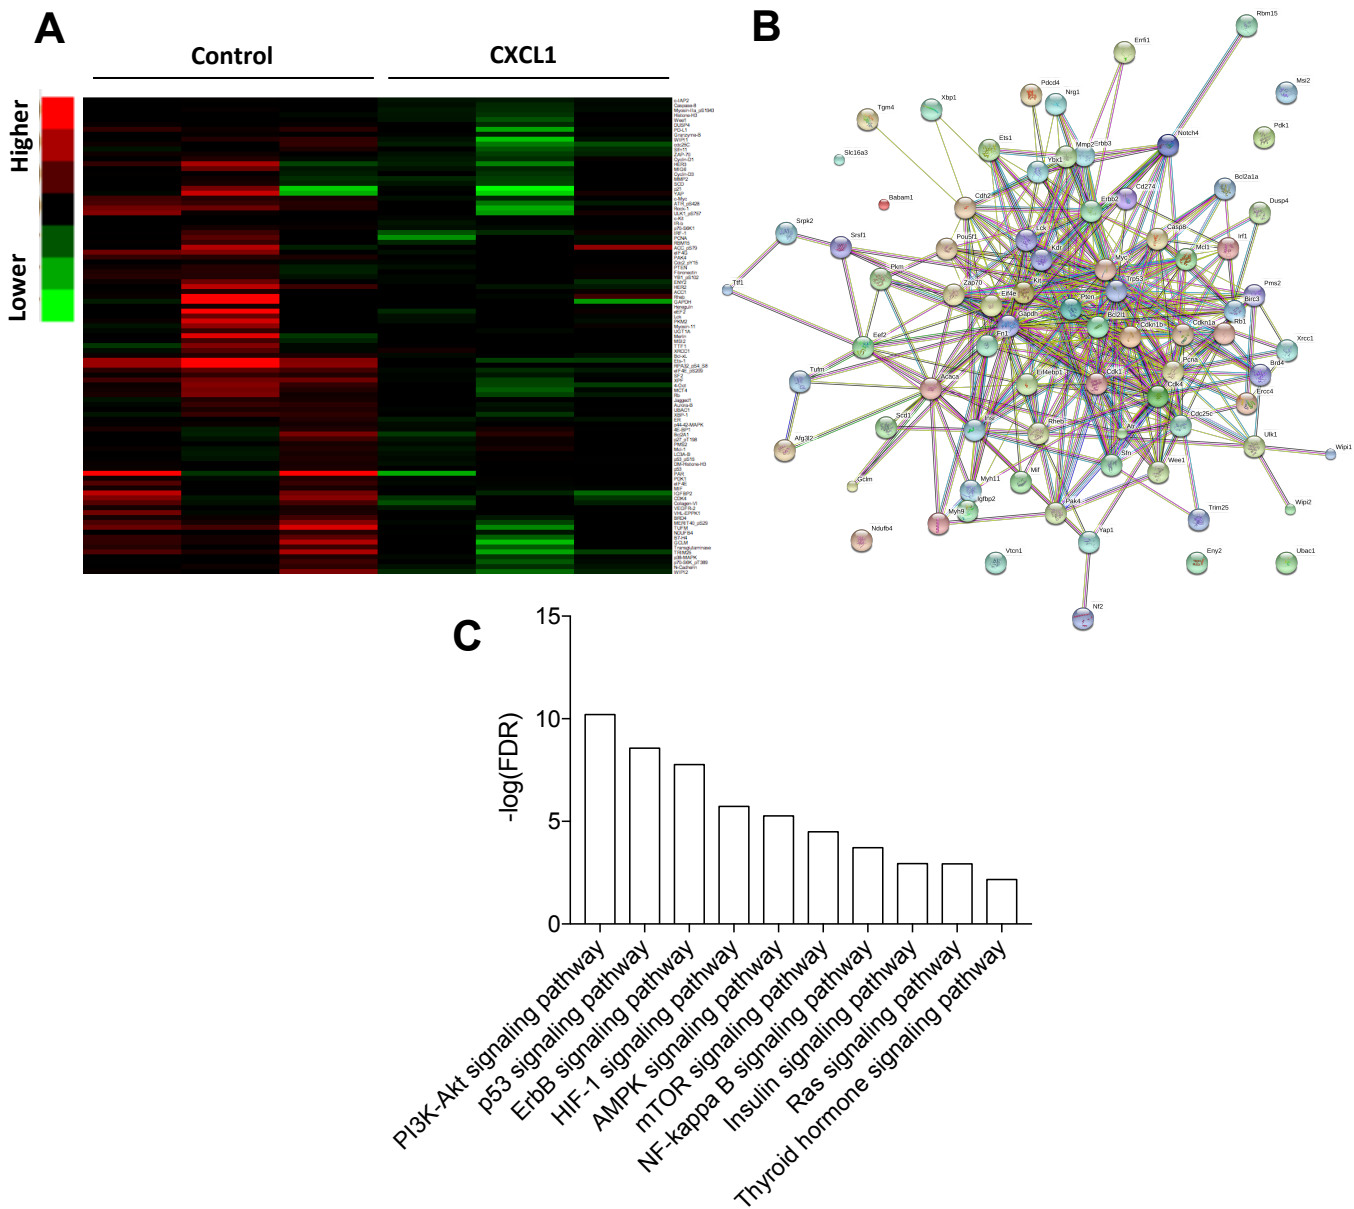

**Supplementary Figure S2. Tumor-derived factors impair myogenic progression of primary myoblast cell cultures. (A)** Heatmap depicting selected down regulated proteins in CXCL1- treated C2C12 cultures as determined by reverse phase protein array (RPPA) analyses. **(B)** STRING-generated protein interaction network of down-regulated proteins from (A). **(C)** A graph depicting log-transformed false discovery rate values of top KEGG annotated “signaling pathways”.



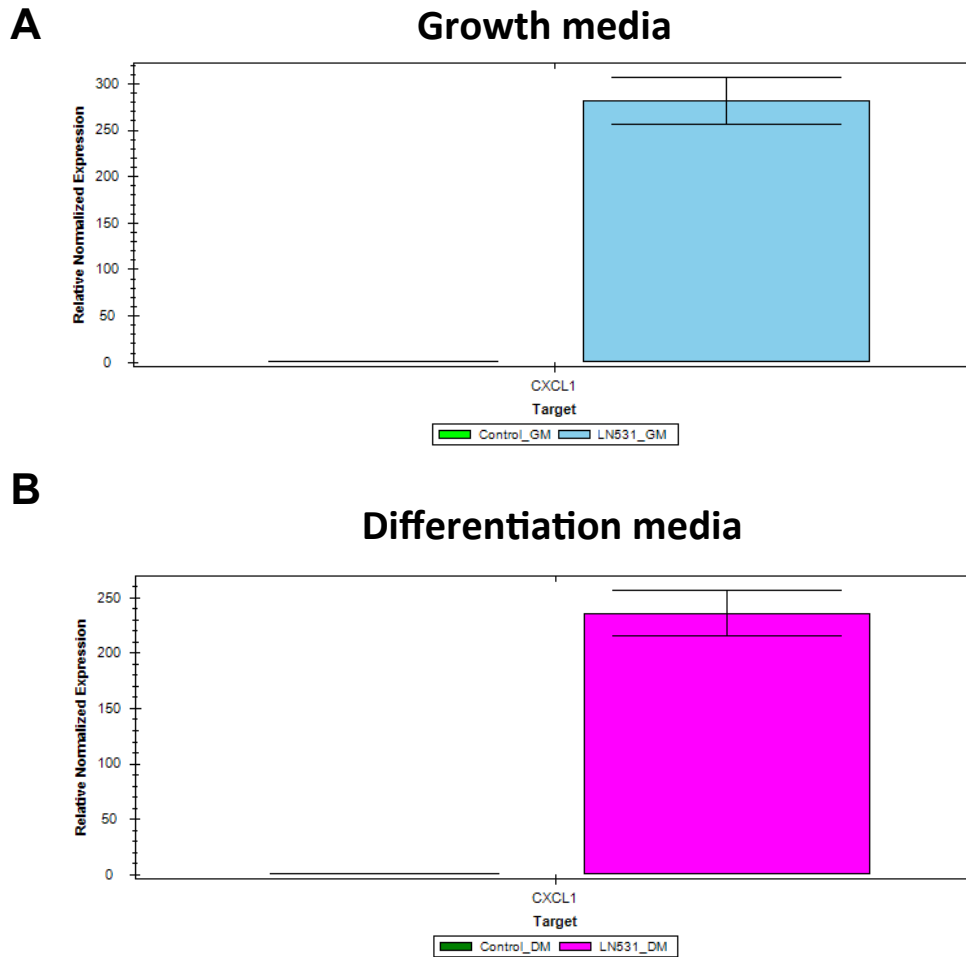

**Supplementary Figure S3. Tumor-derived factors promote *cxc1* mRNA expression in muscle cells. (A)** C2C12s were cultured for 4d in growth media as exposed to a control growth media or 531LN2 conditioned growth media for an additional 24h. Shown is a graph of *cxc1* mRNA expression as determined by qRT-PCR. **(B)** C2C12s were cultured for 4d in differentiation media as exposed to a control differentiation media or 531LN2 conditioned differentiation media for an additional 24h. Shown is a graph of *cxc1* mRNA expression as determined by qRT-PCR. Error bars represent the SD of n=3 experimental replicates.

**A**

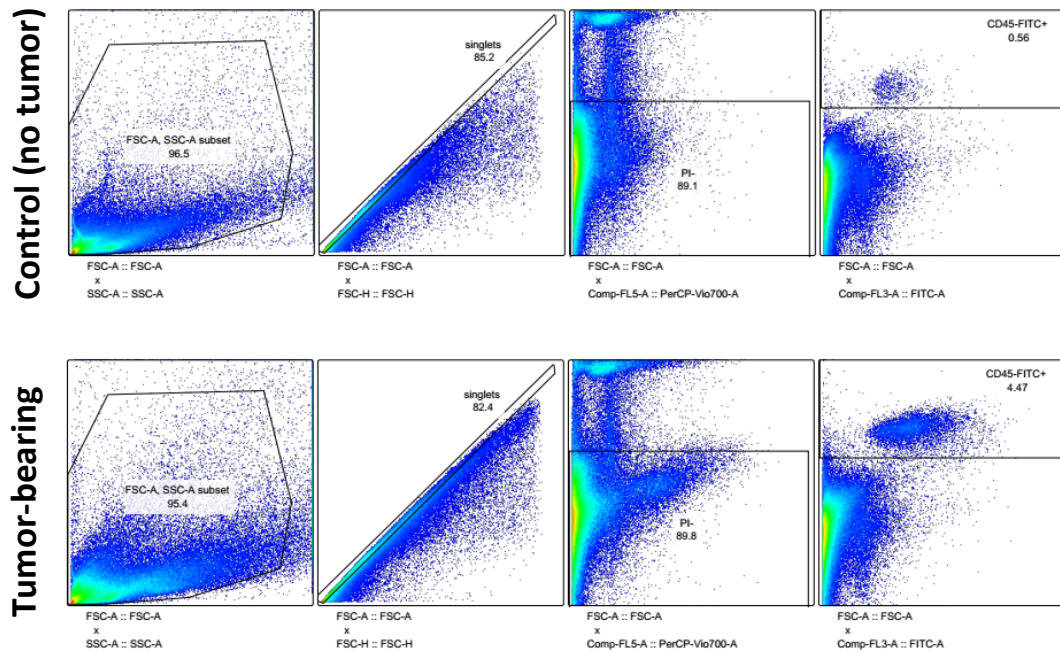

**B**

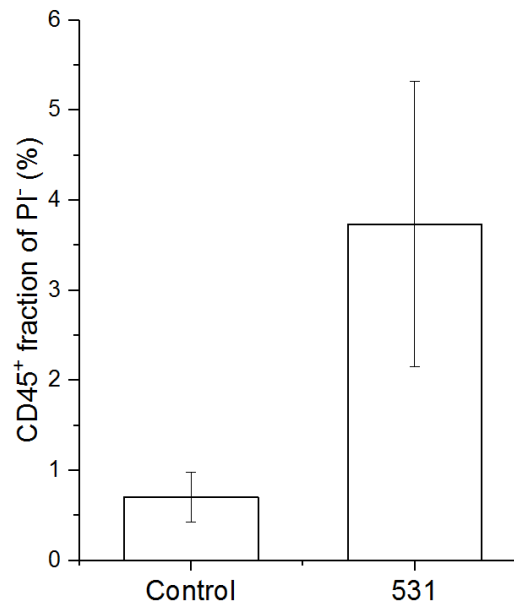

**Supplementary Figure S4. Tumor-bearing mice exhibit elevated CD45<sup>+</sup> cells in hindlimb muscle. (A)** Representative flow cytometry plots depicting CD45 cell abundance in control (top row) and 531LN2 tumor-bearing mice (bottom row). **(B)** A bar graph of CD45<sup>+</sup> cell abundance (% of PI<sup>negative</sup>) in control and tumor-bearing mice. Error bars represent the SD of n=5 mice.

# Supplementary Table 1

List of normalized RPPA values (control vs CXCL1; SD=std deviation)

| Target        | control     | SD         | CXCL1       | SD          |
|---------------|-------------|------------|-------------|-------------|
| 14-3-3-beta   | 0.03815381  | 0.01442723 | -0.066464   | 0.04975697  |
| 4-3-3-epsilon | -0.02541424 | 0.02290762 | 0.00140555  | 0.01816274  |
| 14-3-3-zeta   | -0.0174338  | 0.00749574 | -0.0177657  | 0.03519765  |
| 4E-BP1        | 0.0205827   | 0.06464331 | 0.00668345  | 0.03167115  |
| 4E-BP1_p56    | 0.02012838  | 0.01856424 | 0.01188807  | 0.03717514  |
| 5BP1          | -0.0156002  | 0.06101067 | 0.02332603  | 0.04040187  |
| A-Raf         | -0.0336348  | 0.03133628 | 0.00740939  | 0.03214634  |
| ACC1          | 0.02653805  | 0.03848648 | -0.00704584 | 0.01220376  |
| ACC_p579      | 0.09797503  | 0.22548094 | 0.09653952  | 0.16712943  |
| ADAR1         | -0.0878174  | 0.0853535  | 0.02286576  | 0.00879138  |
| Akt           | 0           | 0          | 0.01109402  | 0.06325718  |
| Akt_p5473     | -0.091795   | 0.17258072 | 0.02707223  | 0.04689047  |
| Akt_pT308     | 0.02391163  | 0.12078071 | -0.0317837  | 0.02904862  |
| MPK-a2_p534   | -0.0698907  | 0.04874567 | 0.02287544  | 0.01898958  |
| AMPKa         | -0.0332367  | 0.00717933 | 0.01419893  | 0.01400447  |
| AMPKa_pT17    | 0.085275    | 0.16672617 | -0.1023525  | 0.29436266  |
| Annexin-I     | -0.0118735  | 0.08134258 | -0.0032767  | 0.01201627  |
| Annexin-VII   | -0.0295841  | 0.1085457  | -0.0184029  | 0.0318748   |
| AR            | -0.0474804  | 0.04117454 | 0.00693823  | 0.02000858  |
| ARID1A        | -0.0415763  | 0.20311289 | 0.11610217  | 0.26569096  |
| Atg3          | -0.0142928  | 0.0707929  | -0.0265983  | 0.03097983  |
| Atg7          | 0           | 0          | -0.0851042  | 0.11586887  |
| ATM           | 0.00519995  | 0.08428045 | 0.00571083  | 0.00989144  |
| ATR           | 0.07276101  | 0.12620571 | -0.0693667  | 0.43726168  |
| ATR_p5428     | 0.10825702  | 0.03617716 | -0.0950249  | 0.12231762  |
| Aurora-B      | 0.05877266  | 0.06294819 | -0.0120229  | 0.02082431  |
| Axl           | -0.0079564  | 0.01378097 | 0.00467181  | 0.25628511  |
| b-Actin       | -0.0197255  | 0.0880106  | 0.00663489  | 0.02132325  |
| b-Catenin     | -0.0007121  | 0.01764878 | 0.01224111  | 0.06890831  |
| atenin_pT41   | -0.019967   | 0.02231411 | 0.04179813  | 0.04509307  |
| B-Raf         | -0.0260757  | 0.02335783 | 0.02351732  | 0.01670899  |
| B-Raf_p5445   | -0.0204263  | 0.06628456 | 0.02935673  | 0.05403538  |
| B7-H4         | 0.10524505  | 0.07281512 | -0.0631389  | 0.10935973  |
| Bad_p5112     | -0.0377918  | 0.04204904 | 0.0518439   | 0.03025973  |
| Bak           | -0.041063   | 0.00371347 | 0.01248026  | 0.00792062  |
| BAP1          | -0.0485262  | 0.04849381 | -0.0431172  | 0.07468125  |
| Bax           | 0.00408858  | 0.02533224 | 0.0221379   | 0.03834396  |
| Bcl-xL        | 0.05021764  | 0.02397173 | -0.0170694  | 0.01742228  |
| Bcl2          | -0.0327306  | 0.05669107 | -0.0106609  | 0.03631121  |
| Bcl2A1        | 0.05099225  | 0.1585495  | -0.0120076  | 0.09653042  |
| Bcln          | -0.0150567  | 0.02609674 | -0.0084206  | 0.02841412  |
| Bid           | -0.0008632  | 0.00145907 | 0.00571793  | 0.01621265  |
| Bim           | -0.0050409  | 0.01254848 | -0.0102316  | 0.01772216  |
| BIP-GRP78     | -0.02071008 | 0.02566008 | -0.0446668  | 0.07736514  |
| BRD4          | 0.06506631  | 0.0544017  | 0.0151787   | 0.02629029  |
| c-Abl         | -0.2723326  | 0.25164207 | 0.00605515  | 0.01048782  |
| c-IP2A        | 0.0026211   | 0.00453987 | -0.0339901  | 0.01271437  |
| c-Jun_p573    | -0.0262251  | 0.04991334 | 0.01802405  | 0.02823622  |
| c-Kit         | 0           | 0          | -0.0038322  | 0.00664822  |
| c-Met         | 0.00220001  | 0.02638385 | -0.0174992  | 0.01617011  |
| ct_pY1234_Y   | -0.089852   | 0.03097532 | 0.01351326  | 0.01696947  |
| c-Myc         | 0.08156235  | 0.04136915 | -0.0332354  | 0.03571196  |
| C-Raf         | -0.0249709  | 0.04457299 | 0.01206802  | 0.02088996  |
| C-Raf_p5338   | -0.0643737  | 0.02980805 | 0.01974682  | 0.02429286  |
| Caspase-3     | -0.0008415  | 0.0377566  | -0.0237981  | 0.03178928  |
| spase-7-cleav | 0.01010338  | 0.0310304  | -0.0022921  | 0.00397002  |
| Caspase-8     | 0           | 0          | -0.0407842  | 0.03328553  |
| Caveolin-1    | -0.0036411  | 0.00630652 | -0.020613   | 0.07981277  |
| CD171         | -0.0329216  | 0.03878572 | -0.0784952  | 0.18418679  |
| CD26          | -0.0585527  | 0.10146118 | 0.01196969  | 0.03269735  |
| CD29          | -0.0262708  | 0.04550229 | -0.0123383  | 0.03142721  |
| CD31          | -0.0223074  | 0.05664854 | -0.0146087  | 0.01265364  |
| CD44          | -0.0266001  | 0.04607265 | -0.057686   | 0.05771131  |
| CD49b         | -0.0084509  | 0.05072028 | -0.0081942  | 0.01419227  |
| cdc25C        | 0.04169363  | 0.0524452  | -0.1503458  | 0.09196145  |
| Cdc2_pY15     | 0.00043125  | 0.01458556 | -0.0036044  | 0.00624307  |
| CDK1          | -0.0216401  | 0.07359216 | 0.00672905  | 0.01165506  |
| CDK2          | -0.0448124  | 0.07544595 | -0.0075842  | 0.01313628  |
| CDK4          | 0.15839485  | 0.1756707  | -0.0667024  | 0.06143417  |
| Chk1          | -0.0289603  | 0.11732359 | -0.0094757  | 0.10475643  |
| Chk1_pS296    | -0.0085734  | 0.08210648 | -0.0135951  | 0.06907213  |
| Chk2          | 0.00154638  | 0.08453818 | -0.075714   | 0.13654433  |
| Chk2_pT68     | -0.0859314  | 0.08162531 | 0.00356622  | 0.01923311  |
| Claudin-7     | -0.1000438  | 0.11457206 | 0.0109356   | 0.02087269  |
| COG3          | -0.0420986  | 0.05545514 | -0.013326   | 0.00230812  |
| Collagen-VI   | 0.0895797   | 0.10548706 | -0.0731793  | 0.07889213  |
| Connexin-43   | 0.03047109  | 0.05277747 | -0.0132323  | 0.07644909  |
| Cox-IV        | 0.14883311  | 0.17174249 | -0.0906231  | 0.15696381  |
| Cox2          | -0.0078886  | 0.01366348 | 0.00228928  | 0.02994783  |
| Creb          | -0.0340303  | 0.03520207 | 0.0084719   | 0.00964444  |
| Cyclin-B1     | -0.0647366  | 0.05166051 | 0           | 0           |
| Cyclin-D1     | 0.01612438  | 0.04360313 | -0.0410461  | 0.05142554  |
| Cyclin-D3     | -0.0130998  | 0.03840284 | -0.0325455  | 0.0563704   |
| Cyclin-E1     | 0.0091941   | 0.01713837 | -0.0417591  | 0.06480925  |
| Cytopliphin-F | -0.0140714  | 0.01312128 | -0.0435184  | 0.03237528  |
| D-a-Tubulin   | 0.02168477  | 0.03755913 | 0.0286642   | 0.02774803  |
| DJ1           | -0.067739   | 0.07956212 | 0.0017321   | 0.01914449  |
| M-Histone-H   | 0.0215661   | 0.02584953 | -0.0108381  | 0.01666839  |
| I-K9-Histone  | -0.0091829  | 0.03578413 | 0           | 0           |
| DUSP4         | 0.00980363  | 0.00878775 | -0.0284206  | 0.04922591  |
| E-Cadherin    | -0.0898502  | 0.10020654 | 0           | 0           |
| E2F1          | -0.0094244  | 0.01632352 | -0.019999   | 0.02604446  |
| eEF2          | 0.3428896   | 0.59291011 | -0.0184491  | 0.0547246   |
| eEF2K         | -0.0760169  | 0.02978882 | 0           | 0           |
| EGFR          | -0.0914419  | 0.07427189 | 0           | 0           |
| EGFR_pY117    | -0.0116513  | 0.01484273 | -0.0152619  | 0.02643435  |
| eIF4E         | 0.08947384  | 0.08165839 | -0.0074446  | 0.00808616  |
| eIF4E_pS209   | 0.13466186  | 0.05047422 | -0.0524289  | 0.03462917  |
| eIF4G         | 0.15746667  | 0.13737887 | -0.008448   | 0.02001538  |
| Etk1_pS383    | -0.0384585  | 0.034238   | -0.0109427  | 0.03083884  |
| EMA           | -0.0153511  | 0.07325739 | 0.00146527  | 0.00253792  |
| ENVY2         | 0.07808606  | 0.11487175 | -0.0322415  | 0.04568163  |
| ER            | 0.02284734  | 0.0362103  | -0.034357   | 0.01733744  |
| ER-a_pS118    | -0.0631472  | 0.03028256 | 0.00396407  | 0.01925791  |
| ERCC1         | -0.0565281  | 0.09790955 | 0.00014741  | 0.18483294  |
| ERCC5         | -0.1181381  | 0.37497208 | 0           | 0           |
| Ets-1         | 0.38433224  | 0.18095553 | -0.0782596  | 0.06784968  |
| FAK           | 0.00086573  | 0.04887692 | 0           | 0           |
| FAK_pY397     | -0.0179528  | 0.03318227 | 0.02601075  | 0.07584853  |
| FASN          | -0.014213   | 0.04061756 | 0.04310315  | 0.06313933  |
| Fibronectin   | 0.02369972  | 0.02746011 | 0.00557144  | 0.00965002  |
| FoxM1         | 0           | 0          | -0.0333103  | 0.06164085  |
| FoxO3a        | -0.0038311  | 0.02038769 | -0.0331183  | 0.08402958  |
| G3a_pS318_S   | -0.0219159  | 0.07228663 | 0.00137653  | 0.00238422  |
| FR-1          | 0.1558986   | 0.15563268 | -0.153537   | 0.26593383  |
| G6PD          | -0.0066104  | 0.01144951 | -0.0389456  | 0.05350693  |
| Gab2          | -0.0440562  | 0.07409373 | 0.03565658  | 0.0419822   |
| GAPDH         | 0.56347395  | 0.12035038 | -0.10138    | 0.17595299  |
| GATA3         | -0.0301364  | 0.06578105 | 0.00026636  | 0.01268653  |
| GCLM          | 0.16234055  | 0.16489565 | -0.1244785  | 0.21560314  |
| GCN5L2        | -0.0058414  | 0.01011762 | 0.00529939  | 0.03114279  |
| lutamide-D1   | 0.0080238   | 0.0108539  | -0.0947962  | 0.03201699  |
| Glutaminase   | -0.0050918  | 0.00881929 | -0.0200205  | 0.06534163  |
| Granzyme-B    | 0.00411986  | 0.00713581 | -0.022392   | 0.02918233  |
| GSK-3a-b      | 0.00399157  | 0.0069136  | 0.00464578  | 0.04505832  |
| K-3a-b_pS21   | -0.0498239  | 0.12132553 | 0.01013843  | 0.01756028  |
| Gys           | -0.0292131  | 0.20037607 | 0.08794355  | 0.13481503  |
| Gys_pS641     | -0.1115592  | 0.18862595 | 0.08497819  | 0.0908867   |
| H2AX_pS140    | -0.0143652  | 0.03495963 | 0.00429147  | 0.03707133  |
| HER2          | 0.16151164  | 0.19024741 | -0.293024   | 0.02561865  |
| HER2_pY1248   | -0.0273033  | 0.05049267 | 0.05871192  | 0.0696102   |
| HER3          | 0.09885369  | 0.23317973 | -0.1045518  | 0.13468474  |
| HER3_pY1288   | -0.001692   | 0.07579816 | 0.02960036  | 0.03636436  |
| Heretulin     | 0.012403    | 0.02292593 | -0.0025651  | 0.0044429   |
| HESt1         | -0.0034117  | 0.05232563 | -0.049053   | 0.00849617  |
| Hexokinase-1  | -0.0269148  | 0.03285423 | -0.0204722  | 0.06340757  |
| Hif-1-alpha   | -0.070649   | 0.02647478 | 0.00691618  | 0.01197917  |
| Histone-H3    | -0.0061747  | 0.01069487 | -0.0472657  | 0.05159175  |
| HSP27         | -0.00779587 | 0.04143888 | -0.0779215  | 0.08796247  |
| HSP27_pS82    | -0.0536509  | 0.0923603  | 0.17351101  | 0.26291935  |
| HSP70         | -0.0027832  | 0.03013924 | 0.02028748  | 0.0293037   |
| R_pY1135_Y    | 0.03180273  | 0.05508395 | 0.02547671  | 0.0372365   |
| IGFBP2        | 0.19817697  | 0.18692855 | -0.0921489  | 0.10394795  |
| IGFBP3        | -0.0530058  | 0.0523233  | 0.00928481  | 0.0239356   |
| INPP4B        | -0.0614416  | 0.0408073  | 0.01147309  | 0.01987197  |
| IR-b          | 0.00342912  | 0.0059394  | -0.014877   | 0.02182354  |
| IRF-1         | 0.04137773  | 0.06725349 | -0.0733774  | 0.09741215  |
| IRS1          | -0.0707133  | 0.1083761  | 0.00655229  | 0.00570853  |
| Jagged1       | 0.02462189  | 0.05474855 | 0           | 0           |
| Jak2          | -0.0220387  | 0.14043417 | 0.01571046  | 0.02721132  |
| JNK2          | -0.047405   | 0.04292028 | 0.0269273   | 0.03416427  |
| K_pT183_Y1    | 0.04667688  | 0.11340305 | 0.00455442  | 0.05461864  |
| L-CA3-B       | -0.0014784  | 0.04696996 | -0.0090844  | 0.01573465  |
| Lck           | 0.06811133  | 0.11797229 | -0.0138542  | 0.01562331  |
| LDHA          | -0.0973931  | 0.06871215 | 0.00013168  | 0.009915725 |
| LRP_pS149C    | -0.0361687  | 0.07844571 | 0.01052426  | 0.01572536  |
| PK_pT202_Y    | -0.0517102  | 0.1884161  | -0.0208119  | 0.04278123  |
| Mcl-1         | 0.01522167  | 0.05239894 | 0.00089787  | 0.04700712  |
| MCT4          | 0.11312172  | 0.10672625 | -0.0642113  | 0.09947457  |
| MDM2_pS16     | -0.0402798  | 0.2862681  | 0           | 0           |
| MEK1          | -0.0494647  | 0.05922443 | 0.07003971  | 0.04846928  |
| K1_pS217_Y    | -0.0264765  | 0.06015136 | -0.0022139  | 0.01917297  |
| MERIT40_pS2   | 0.15038475  | 0.10673402 | -0.0481426  | 0.07244001  |
| Merlin        | 0.11241487  | 0.29320888 | -0.0004488  | 0.00077732  |
| MIF           | 0.02990708  | 0.02611416 | -0.0090199  | 0.00805716  |
| MIG6          | 0.05143543  | 0.1281801  | -0.0356765  | 0.03267798  |
| MMP2          | -0.0183706  | 0.06350029 | -0.066377   | 0.0623947   |
| Mnk1          | -0.082367   | 0.01137503 | 0           | 0           |
| MSH6          | -0.1384334  | 0.13403279 | 0.00498907  | 0.00864132  |
| MSI2          | 0.01992902  | 0.10196906 | -0.0003683  | 0.00063788  |
| mTOR          | -0.0015503  | 0.00179438 | 0.01221345  | 0.01229985  |
| nTOR_pS244    | -0.0101524  | 0.01758449 | 0.07976109  | 0.13194032  |
| Mysin-11      | 0.08217239  | 0.17504432 |             |             |
